# Supplementary material for: Treatment of Cesarean Scar Ectopic Pregnancy in China with Uterine Artery Embolization—A Systematic Review and Meta-Analysis
Source: J Clin Med. 2022 Dec 13;11(24):7393. doi: 10.3390/jcm11247393 (PMC9783593; doi:10.3390/jcm11247393)
Supplement: Supplementary file 1 [file jcm-11-07393-s001.zip › jcm-2015758-supplementary.pdf]

Treatment of Cesarean Scar Ectopic Pregnancy in China with Uterine Artery Embolization—A Systematic Review and Meta-Analysis

Greg J. Marchand <sup>1,\*</sup>, Ahmed Taher Masoud <sup>1,2</sup>, Catherine Coriell <sup>1</sup>, Hollie Ulibarri <sup>1</sup>, Julia Parise <sup>1</sup>, Amanda Arroyo <sup>1</sup>, Sydnee Goetz <sup>1</sup>, Carmen Moir <sup>1</sup>, Atley Moberly <sup>1</sup> and Malini Govindan <sup>1</sup>

<sup>1</sup> Marchand Institute for Minimally Invasive Surgery, Mesa, AZ 85209, USA

<sup>2</sup> Faculty of Medicine, Fayoum University, Fayoum 63514, Egypt

\* Correspondence: gm@marchandinstitute.org

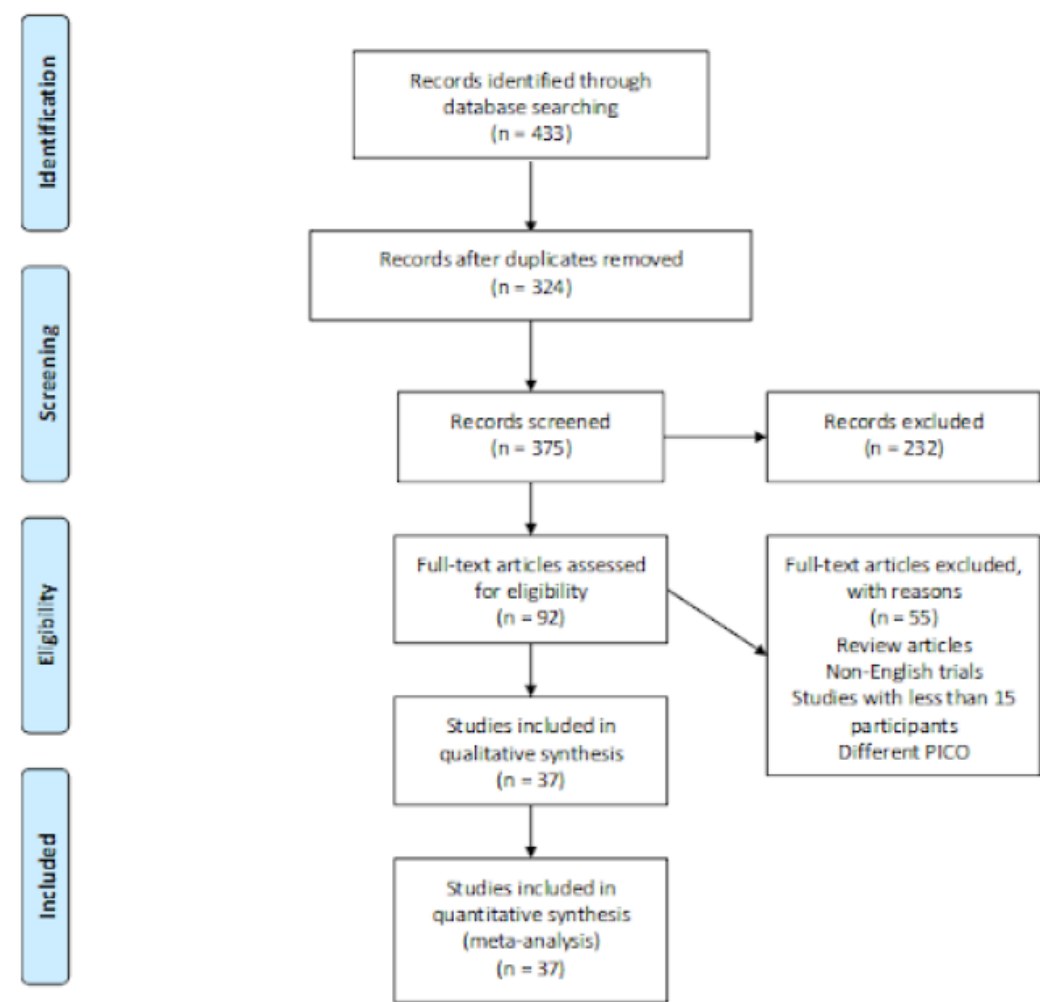

Supplementary Figure S1. PRISMA flow chart summarizing the process of study selection.

Supplemental Table S1

Supplemental Table S1: The Risk of Bias for all included Cohort studies (by NIH tool)

| ID              | 1   | 2   | 3   | 4   | 5   | 6   | 7   | 8  | 9   | 10 | 11  | 12 | 13  | 14  | Total score | Quality rating |
|-----------------|-----|-----|-----|-----|-----|-----|-----|----|-----|----|-----|----|-----|-----|-------------|----------------|
| Cao 2017 [20]   | Yes | Yes | NA  | No  | No  | yes | yes | NA | Yes | NA | Yes | NA | Yes | no  | 8.5         | Fair           |
| Chen 2017 [22]  | Yes | Yes | NA  | No  | No  | yes | yes | NA | Yes | NA | Yes | NA | Yes | no  | 8.5         | Fair           |
| Cheng 2020 [23] | Yes | Yes | NA  | No  | No  | yes | yes | NA | Yes | NA | Yes | NA | Yes | no  | 8.5         | Fair           |
| Fei 2019 [27]   | Yes | Yes | NA  | No  | No  | yes | yes | NA | Yes | NA | Yes | NA | Yes | Yes | 9           | Fair           |
| Gao 2018 [14]   | Yes | Yes | NA  | Yes | yes | yes | yes | NA | Yes | NA | Yes | NA | Yes | Yes | 10          | Fair           |
| Guo 2018 [18]   | Yes | Yes | NA  | Yes | No  | yes | yes | NA | Yes | NA | Yes | NA | Yes | Yes | 9.5         | Fair           |
| Hong 2017 [30]  | Yes | Yes | NA  | No  | No  | yes | yes | NA | Yes | NA | Yes | NA | Yes | Yes | 9           | Fair           |
| Li 2020 [32]    | Yes | Yes | NA  | Yes | No  | yes | yes | NA | Yes | NA | Yes | NA | Yes | Yes | 9.5         | Fair           |
| Li 2018 [33]    | Yes | No  | NA  | No  | No  | yes | yes | NA | Yes | NA | Yes | NA | No  | Yes | 8           | Poor           |
| Liu 2016 [36]   | Yes | No  | Yes | No  | No  | yes | yes | NA | Yes | NA | Yes | NA | Yes | no  | 9           | Fair           |
| Liu 2015 [35]   | Yes | Yes | NA  | No  | No  | yes | yes | NA | Yes | NA | Yes | NA | Yes | no  | 8.5         | Fair           |
| Lou 2020 [37]   | Yes | Yes | NA  | No  | No  | yes | yes | NA | Yes | NA | Yes | NA | Yes | no  | 8.5         | Fair           |
| Ma 2017 [38]    | Yes | Yes | NA  | No  | No  | yes | yes | NA | Yes | NA | Yes | NA | Yes | Yes | 9           | Fair           |
| Ou 2020 [39]    | Yes | Yes | Yes | No  | No  | yes | yes | NA | Yes | NA | Yes | NA | Yes | Yes | 10          | Fair           |
| Pyra 2021 [40]  | Yes | No  | NA  | No  | No  | yes | yes | NA | Yes | NA | Yes | NA | Yes | no  | 8           | Poor           |
| Qiu 2019 [43]   | Yes | Yes | Yes | Yes | No  | yes | yes | NA | Yes | NA | Yes | NA | Yes | no  | 10          | Fair           |
| Wang 2021 [16]  | Yes | Yes | NA  | No  | No  | yes | yes | NA | Yes | NA | Yes | NA | Yes | no  | 8.5         | Fair           |
| Wang 2019 [50]  | Yes | Yes | NA  | No  | No  | yes | yes | NA | Yes | NA | Yes | NA | Yes | no  | 8.5         | Fair           |
| Xiao 2018 [48]  | Yes | Yes | NA  | No  | No  | yes | yes | NA | Yes | NA | Yes | NA | Yes | no  | 8.5         | Fair           |
| Xiao 2019 [49]  | Yes | Yes | NA  | Yes | No  | yes | yes | NA | Yes | NA | Yes | NA | Yes | no  | 9           | Fair           |
| Zhang 2019 [52] | Yes | Yes | NA  | No  | No  | yes | yes | NA | Yes | NA | Yes | NA | Yes | no  | 8.5         | Fair           |
| Fahg 2009 [25]  | Yes | Yes | NA  | No  | No  | yes | yes | NA | Yes | NA | Yes | NA | Yes | no  | 8.5         | Fair           |
| Gao 2014 [28]   | Yes | Yes | Yes | Yes | No  | yes | yes | NA | Yes | NA | Yes | NA | Yes | no  | 10          | Fair           |
| Wang 2013 [47]  | Yes | Yes | NA  | No  | No  | yes | yes | NA | Yes | NA | Yes | NA | Yes | Yes | 9           | Fair           |
| Cao 2014 [21]   | Yes | Yes | NA  | No  | No  | yes | yes | NA | Yes | NA | Yes | NA | Yes | no  | 8.5         | Fair           |
| Du 2015 [24]    | Yes | Yes | Yes | Yes | No  | yes | yes | NA | Yes | NA | Yes | NA | Yes | Yes | 10.5        | Fair           |
| Huang 2015 [31] | Yes | Yes | NA  | No  | No  | yes | yes | NA | Yes | NA | Yes | NA | Yes | no  | 8.5         | Fair           |
| Liang 2010 [34] | Yes | Yes | NA  | No  | No  | yes | yes | NA | Yes | NA | No  | NA | Yes | no  | 8           | Poor           |
| Shen 2012 [44]  | Yes | Yes | NA  | No  | No  | yes | yes | NA | Yes | NA | Yes | NA | Yes | no  | 8.5         | Fair           |
| Wu 2012 [13]    | Yes | Yes | NA  | Yes | No  | yes | yes | NA | Yes | NA | Yes | NA | Yes | no  | 9           | Fair           |
| Yang 2010 [51]  | Yes | Yes | NA  | No  | No  | yes | yes | NA | Yes | NA | Yes | NA | Yes | Yes | 9           | Fair           |
| Zhu 2015 [53]   | Yes | Yes | NA  | Yes | No  | yes | yes | NA | Yes | NA | Yes | NA | Yes | no  | 9           | Fair           |
| He 2014 [29]    | Yes | Yes | NA  | Yes | No  | yes | yes | NA | Yes | NA | Yes | NA | Yes | no  | 9           | Fair           |
| Wang 2021 [16]  | Yes | Yes | NA  | No  | No  | yes | yes | NA | Yes | NA | Yes | NA | Yes | no  | 8.5         | Fair           |
| Wang 2019 [50]  | Yes | Yes | NA  | No  | No  | yes | yes | NA | Yes | NA | Yes | NA | Yes | no  | 8.5         | Fair           |

NA: Not applicable

- 1: Was the research question or objective in this paper clearly stated?
- 2: Was the study population clearly specified and defined?
- 3: Was the participation rate of eligible persons at least 50%?
- 4: Were all the subjects selected or recruited from the same or similar populations (including the same time period)? Were inclusion and exclusion criteria for being in the study prespecified and applied uniformly to all participants?
- 5: Was a sample size justification, power description, or variance and effect estimates provided?
- 6: For the analyses in this paper, were the exposure(s) of interest measured prior to the outcome(s) being measured?
- 7: Was the time frame sufficient so that one could reasonably expect to see an association between exposure and outcome if it existed?

- 8: For exposures that can vary in amount or level, did the study examine different levels of the exposure as related to the outcome (eg, categories of exposure, or exposure measured as continuous variable)?
- 9: Were the exposure measures (independent variables) clearly defined, valid, reliable, and implemented consistently across all study participants?
- 10: Was the exposure(s) assessed more than once over time?
- 11: Were the outcome measures (dependent variables) clearly defined, valid, reliable, and implemented consistently across all study participants?
- 12: Were the outcome assessors blinded to the exposure status of participants?
- 13: Was there loss to follow-up after baseline 20% or less?
- 14: Were key potential confounding variables measured and adjusted statistically for their impact on the relationship between exposure(s) and outcome(s)?

Supplemental Table S2

Supplemental Table S2: Risk of Bias for all included Case series studies (by NIH tool)

| ID             | 1   | 2   | 3   | 4   | 5   | 6   | 7   | 8   | 9   | Total scores | Quality rating |
|----------------|-----|-----|-----|-----|-----|-----|-----|-----|-----|--------------|----------------|
| Qi 2015 [41]   | Yes | 9            | Good           |
| Fang 2020 [26] | Yes | 9            | Good           |

- 1: Was the study question or objective clearly stated?
- 2: Was the study population clearly and fully described, including a case definition?
- 3: Were the cases consecutive?
- 4: Were the subjects comparable?
- 5: Was the intervention clearly described?
- 6: Were the outcome measures clearly defined, valid, reliable, and implemented consistently across all study participants?
- 7: Was the length of follow-up adequate?
- 8: Were the statistical methods well-described?
- 9: Were the results well-described?
